# Supplementary material for: Comparative effects of free doxorubicin, liposome encapsulated doxorubicin and liposome co-encapsulated alendronate and doxorubicin (PLAD) on the tumor immunologic milieu in a mouse fibrosarcoma model
Source: PubMed Central journal article supplement (PMC9461478; doi:10.7150/ntno.75045), 2022-09-01
Supplement: ntnov06p0451s1.pdf [file ntnov06p0451s1.pdf]

| PLAD Batch | Size (nm) | PDI   | Zeta pot. (mV) | Osm. mOsm /kg | pH  | ALD (mg/g) | Cholesterol (mg/g) | DSPE-PEG <sub>2000</sub> (mg/g) | HSPC (mg/g) | DOX-HCl (mg/g) |
|------------|-----------|-------|----------------|---------------|-----|------------|--------------------|---------------------------------|-------------|----------------|
| Levco 3    | 110.3     | 0.058 | -12.13         | 317           | 7.1 | 0.5        | 1.62               | 1.36                            | 4.6         | 0.9            |
| Levco 2    | 99.8      | 0.028 | -13.41         | 291           | 6.7 | 0.6        | 1.62               | 1.21                            | 4.3         | 0.9            |

**Supplemental Table S1:** Characteristics of PLAD batches used in this study. All values fall within the pre-specified acceptable range. The potency of the batch is labeled as 1 mg/mL (acceptable range 0.9-1.1) in DOX HCl equivalents, although the actual result is 0.9 mg/g or mL.

| Myeloid Panel (TAM, MDSC, DC) |                 |             |
|-------------------------------|-----------------|-------------|
| Antigen                       | Antibody Clone  | Fluorophore |
| CD45                          | 30-F11          | AF700       |
| CD11b                         | M1/70           | AF647       |
| Gr1                           | RB6-8C5         | AF488       |
| F4/80                         | BM8             | BV421       |
| CD11c                         | N418            | APC-Cy7     |
| CD8a                          | 53-6.7          | PerCP-Cy5.5 |
| CD206                         | C068C2          | BV650       |
| MHC-II                        | M5/114.15.2     | BV510       |
| (Viability dye)               | (Zombie Yellow) | (BV570)     |
| (Doxorubicin)                 | -               | (PE-TR)     |

**Supplemental Table S2:** Reagents for myeloid panel

| CTL, NK, NKT Panel |                  |             |
|--------------------|------------------|-------------|
| Antigen            | Antibody Clone   | Fluorophore |
| CD45               | 30-F11           | AF700       |
| CD3                | 17A2 (T and NKT) | APC-Cy7     |
| CD4                | GK1.5            | AF488       |
| CD8a               | 53-6.7           | PerCP-Cy5.5 |
| CD49b              | DX5              | AF647       |
| NKp46              | 29A1.4           | BV510       |
| CD69               | H1.2F3           | PE-CF594    |
| CTLA-4             | UC10-4B9         | PE          |
| PD-1               | 29F.1A12         | BV421       |
| Viability dye      | (Zombie Yellow)  | (BV570)     |

**Supplemental Table S3:** Reagents for CTL, NK and NKT panel

| Treg Panel      |                 |             |
|-----------------|-----------------|-------------|
| Antigen         | Antibody Clone  | Fluorophore |
| CD45            | 30-F11          | AF700       |
| CD4             | GK1.5           | AF488       |
| CD25            | PC61            | AF647       |
| FoxP3 (nuclear) | MF-14           | BV421       |
| Viability dye   | (Zombie Yellow) | (BV570)     |

**Supplemental Table S4:** Reagents for Treg panel

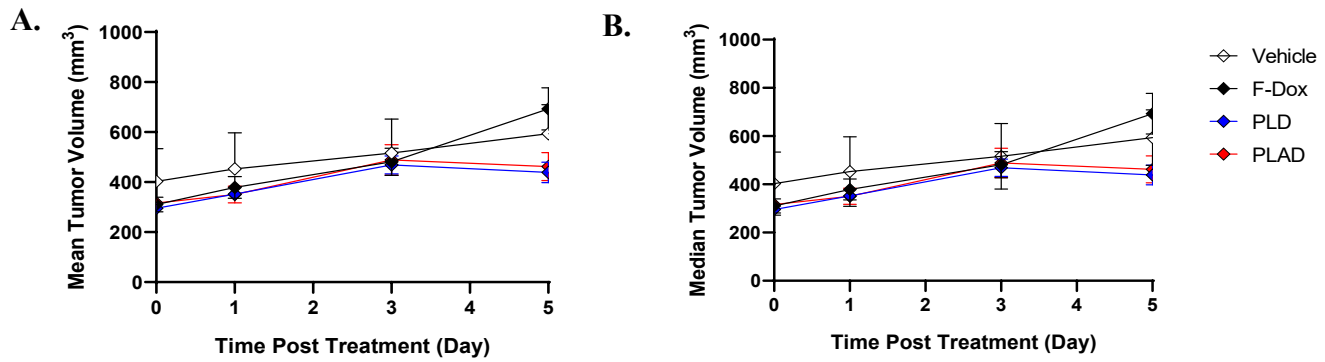

**Supplemental Figure S1:** The (A) mean and (B) median tumor volumes of different treatment groups (post treatment) were not statistically different in significance at any timepoint until tissue collection. Data analysis: Two-Way ANOVA (Dunnett's multiple comparisons); GraphPad Prism 9.3.1 (471).

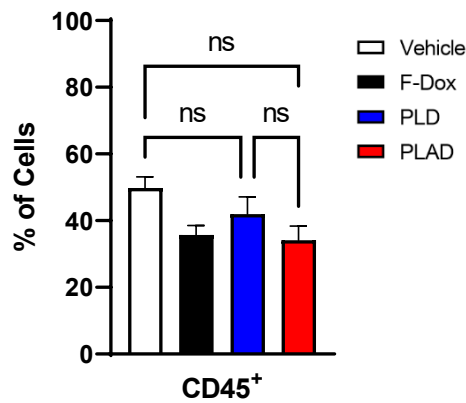

**Supplemental Figure S2:** There was no statistically significant difference in overall numbers of tumor-infiltrating leukocytes between the treatment groups. Data analysis: One-Way ANOVA (Tukey's multiple comparisons); GraphPad Prism 9.3.1 (471).

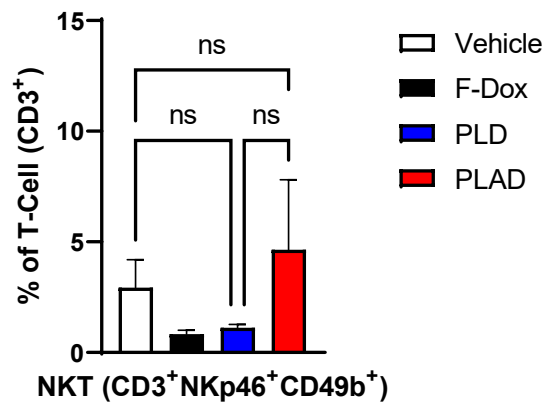

**Supplemental Figure S3:** The proportions of NKT cells out of total T-cells are not significantly different between treatment groups. Data analysis: One-way ANOVA (Tukey's multiple comparison); GraphPad Prism 9.3.1 (471).

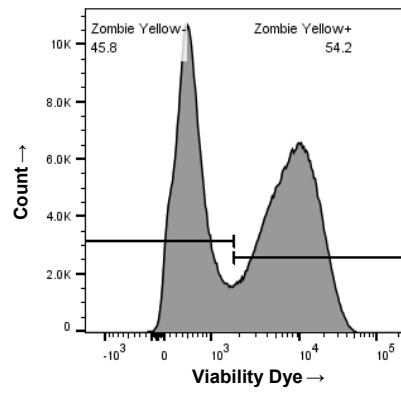

**Supplemental Figure S4:** Gating strategy for viable cells.
